## Habitat fragmentation causes coevolutionary burning spots

H. De Kort<sup>1\*</sup>, M. Baguette<sup>1,2</sup>, J.G. Prunier<sup>1</sup>, M. Tessier<sup>3</sup>, J. Monsimet<sup>4</sup>, C. Turlure<sup>5</sup>, V.M. Stevens<sup>1</sup>

**1** Station d'Ecologie Théorique et Expérimentale (UMR 5321 SETE), National Center for Scientific Research (CNRS) and Université Toulouse III – Paul Sabatier, 2 Route du CNRS, 09200 Moulis, France.

**2** Institut de Systématique, Evolution, Biodiversité (UMR 7205), Muséum National d'Histoire Naturelle, CP 50, 45 rue Buffon, 75005 Paris, France.

**3** Marc Tessier, 62 chemin Del prat, 31320 Auzeville-Tolosane, France.

**4** Parc Naturel Régional des Marais du Cotentin et du Bessin, 3 village Ponts d'Ouve, 50500 Carentan-les-Marais, France

**5** Earth and Life Institute, Université catholique de Louvain, Croix du Sud 4, 1348 Louvain-la-Neuve, Belgium.

\* Correspondence to: [hanne.dekort@sete.cnrs.fr](mailto:hanne.dekort@sete.cnrs.fr), [hanne.dekort@kuleuven.be](mailto:hanne.dekort@kuleuven.be)

**Abstract:** Habitat fragmentation increasingly threatens the services provided by natural communities and ecosystem worldwide. An understanding of the underlying eco-evolutionary processes in natural settings is lacking, yet critical to realistic and sustainable conservation. Through integrating the multivariate genetic, biotic and abiotic facets of a natural community network experiencing various degrees of habitat fragmentation, we provide unique insights into the processes underlying community functioning in real, natural conditions. The focal community network comprises a parasitic butterfly of conservation concern, and its two obligatory host species, a plant and an ant. We show that fragmentation of butterfly habitat has the potential to impair the balance between dispersal and coevolution. This process can cause coevolutionary burning spots of decreased genetic diversity and therefore of increased extinction risk. We stress that ignoring such eco-evolutionary feed-backs inherent to the very functioning of natural communities can strongly impact their persistence.

**One Sentence Summary:** Communities under threat of habitat fragmentation suffer increased extinction risk through coevolutionary overheating.

34 Biotic interaction networks including pollination, competition and parasitism play a key  
35 role in community functioning and persistence, but global environmental changes compromise  
36 their ecological and evolutionary stability (1–3). Fueled by ongoing land conversions, habitat  
37 fragmentation in particular increasingly degrades ecological communities and ecosystems  
38 across the globe (4, 5). Yet attempts to mitigate these impacts are hampered by a markedly  
39 poor understanding of the eco-evolutionary dynamics driving biotic interaction networks under  
40 threat of habitat fragmentation (6–8). Indeed, owing to technical challenges associated with  
41 studying eco-evolutionary community processes in natural settings, non-experimental  
42 empirical studies demonstrating how biotic interactions implicate the ability of species to  
43 withstand habitat fragmentation are lacking.

44 Theoretical models and experimental work on microbial communities predict that  
45 habitat fragmentation and community functioning are linked through the effects of landscape  
46 connectivity on dispersal, the latter defining individual movements across the landscape (9–  
47 12). According to these *in silico* and *in vitro* studies, intermediate levels of dispersal facilitate  
48 species evolution and species sorting concordant with local biotic and abiotic conditions,  
49 whereas low (or high) levels of dispersal can deplete (or swamp) locally adapted communities.  
50 However, the exact processes determining eco-evolutionary outcomes are highly variable,  
51 shaped by species' genetic architecture, their phenotypic variation, the strength and amount of  
52 interactions with local biotic and abiotic variables, and the eco-evolutionary feedbacks  
53 resulting from interactions between each of these components (7, 13). This complexity is  
54 compromising empirical validation of theoretical predictions, urging for a more realistic  
55 perspective on the impacts of altered landscape connectivity on communities and ecosystems  
56 (14–16).

57 Analogously to the interwoven nature of community dynamics and adaptive evolution,  
58 we propose the integration of landscape genetic disciplines in community ecology (17) to  
59 address this complexity *in situ*. Ecological and evolutionary processes including drift, gene  
60 flow, and abiotic and coevolutionary selection directly influence patterns of genetic variation  
61 within and among communities. Coevolution in particular, i.e. the process by which two or  
62 more interacting species reciprocally affect each other's evolution, may give rise to specific  
63 genetic signatures when communities are spatially structured. More specifically, spatial  
64 community structure can generate a geographic mosaic of coevolutionary hot spots featured by  
65 strong reciprocal selection among interacting species (18–20). Where local coevolution  
66 prevents successful immigration of maladapted individuals, or when it favours reduced  
67 dispersal ability in isolated habitats (21), such selection mosaics can result in paralleled genetic  
68 structure among interacting species (22). Assessing population genetic variation within and  
69 among the different species of a community network may therefore shed light on the impact of  
70 habitat fragmentation on community dynamics.

71  
72 Here we present the first empirical data showing how habitat fragmentation can impact  
73 the eco-evolutionary dynamics propelling communities in natural settings. We focus on a  
74 community system highly appreciated for its conservation value: the threatened and specialized  
75 European butterfly *Phengaris* (= *Maculinea*) *alcon alcon* (the Alcon blue, hereafter “butterfly”)  
76 and its two obligatory hosts, a rare grassland plant *Gentiana pneumonanthe* (the march Gentian,  
77 hereafter “plant”) and an ant of the genus *Myrmica* (here the common *M. scabrinodis*, hereafter  
78 “ant”) (Fig.1A) (23, 24). Due to habitat fragmentation, the butterfly faces local extinctions  
79 across its range, even where its hosts remain locally abundant (25). We focus on a mountainous  
80 landscape in the French department Ariège (4890 km<sup>2</sup>), where we investigated all known  
81 butterfly communities. These community sites are spatially structured into four disjoint clusters  
82 (metacommunities), with among-cluster distances (>10km) exceeding the known maximum

83 dispersal distance of the butterfly (0.5km) (Fig.1B-D, Fig.S1). The communities span an  
84 altitudinal gradient from 400 to 1017 m, with patch sizes varying between 275 and 17,359 m<sup>2</sup>  
85 (Table S1).

86 Based on land use, plant requirements, and the biology of the butterfly, we mapped  
87 butterfly dispersal probability across the landscape to obtain a relevant measure of landscape  
88 connectivity for this species (Fig.1D, Table S2-3). Because habitat fragmentation deteriorates  
89 landscape connectivity through reductions in the amount of habitat suitable for dispersal and  
90 breeding, and through increased geographical distance among breeding sites, it typically  
91 disrupts the genetic integrity of butterfly populations (26). In line with this unfavourable trend,  
92 we found that decreased landscape connectivity increased the genetic distance between the  
93 butterfly populations under study (Fig.S2). This finding is consistent with field observations  
94 obtained during daily individual butterfly movement monitoring, showing some dispersal  
95 within geographical clusters (3.55% butterflies recaptured in another site vs. 35.49%  
96 recaptured on site), limited dispersal among the nearest clusters (0.51%), and no dispersal  
97 among the more distant clusters (Fig. S1). By hindering butterfly movements across the  
98 landscape to various extents, habitat fragmentation thus resulted in a spatial mosaic of highly  
99 and poorly connected sites (Fig.1D).

100 We then explored how the genetic diversity within communities was affected by  
101 landscape connectivity, local habitat size and altitude. Genetic diversity was calculated for 22  
102 butterfly, 37 plant and 29 ant populations, based on high-quality single nucleotide  
103 polymorphisms obtained through pooled RADseq (Fig.S3). We found a marked negative effect  
104 of decreasing landscape connectivity on butterfly genetic diversity (Fig.2A, Fig.S4, Table S3),  
105 implying a harmful effect of habitat fragmentation on its population dynamics. We also  
106 observed that both butterfly and plant genetic diversity decreased with altitude (Fig.2B).  
107 Because census population sizes did not follow an altitudinal pattern (Fig. S5), we devote this  
108 result to historical post-glacial migration to higher altitudes followed by population expansion.  
109 Together, landscape connectivity and altitude explained 74.23% ( $R^2_{adj}$ ) of the variation in  
110 butterfly genetic diversity.

111 Given the absence of a negative correlation between butterfly and host genetic diversity,  
112 our results also suggest limited parasitic impact of the butterfly on its two host species. To  
113 corroborate this theory, we compared ant and plant genetic diversity between sites with high  
114 vs. low butterfly population density (i.e. high vs. low parasitic pressure), and sites where the  
115 butterfly got extinct in the last 5 years (Table S1). The genetic diversity of the hosts did not  
116 decrease with increased butterfly density (Fig.2D), indicating that the hosts are not markedly  
117 impacted by butterfly population dynamics. Importantly, this also suggests that conservation  
118 efforts aiming to increase connectivity for butterflies would maintain the functioning of the  
119 community network without compromising the host species.

120 The strong positive correlation between butterfly and plant genetic diversity, but not  
121 between butterfly and ant genetic diversity (Fig.2C, Table S4), corresponds to the shared effect  
122 of altitude on their genetic diversity (Fig.2B). However, because the correlation between  
123 butterfly and plant diversity is significant only where landscape connectivity is relatively low  
124 (Fig.2C), genetic diversity losses in the plant (the least mobile partner of the community) may  
125 have negative consequences for butterfly genetic diversity where habitat fragmentation  
126 impedes butterfly gene flow between populations. To confirm the genetic dependence between  
127 the butterfly and the hosts in the context of habitat fragmentation, an understanding of both the  
128 abiotic and coevolutionary drivers of community dynamics is required.

129 We therefore investigated the contributions of abiotic landscape variation to butterfly  
130 and host genetic structure, using multivariate landscape and community genetic approaches  
131 (Table S4). To approximate the abiotic (incl. spatial) environment, we modelled latitude,  
132 longitude, altitude, habitat size and landscape connectivity (for the butterfly) or geographical  
133 isolation (for the hosts). We thus also accounted for all existing environmental clines that are  
134 generally known to covary with these factors (e.g. temperature and precipitation). The abiotic  
135 variables explained a significant proportion of the community genetic structure, varying from  
136 13.72% for ants over 28.03% for plants to 32.95% for butterflies. Latitude, longitude and  
137 altitude all contributed to the notable genetic structure of the butterfly and the plant (Fig.3A-  
138 C, Fig.S6). The genetic structure of the ant was less pronounced, although the southern clusters  
139 were strongly differentiated owing to geographical isolation and altitudinal differences  
140 (Fig.3C). Together, these findings indicate an important role for spatial structure and the  
141 associated abiotic clines in driving genetic differences among communities. On top of the  
142 observed spatial effects, landscape connectivity influenced butterfly genetic structure (Fig.3A),  
143 suggesting that habitat fragmentation interferes with its metapopulation dynamics. As expected  
144 from the complexity inherent to natural communities, a large part of the genetic structure  
145 remains unexplained, and could be partially due to biotic interactions which are most often  
146 ignored in landscape genetic studies.

147 We thus incorporated the genetic structure of the host species as a proxy for the biotic  
148 environment of the butterfly, to identify the proportion of its genetic structure covarying with  
149 host genetic structure while accounting for the abiotic environment. The resulting model (Table  
150 S4) provides insights in unique, independent processes driving butterfly genetic structure,  
151 captured by so-called co-inertia axes, in addition to shared, interdependent processes. To assess  
152 the effect of habitat fragmentation on the degree of covariation (i.e. co-inertia) between  
153 butterfly and host genetic structure, we contrasted between poorly and highly connected  
154 butterfly populations. Substantial variation in butterfly genetic structure can be explained by  
155 host genetic structure and abiotic variation, although this covariation was only significant for  
156 the poorly connected sites (covariation coefficient = 0.85<sup>ns</sup> and 0.84\*\* for high and low  
157 connectivity, respectively, Table S4). Overall, most of the butterfly genetic variation co-varied  
158 with the abiotic and biotic environment simultaneously (Fig.3D), indicating shared effects  
159 between the abiotic variables and the host genetic structure on butterfly genetic structure. This  
160 is in line with our observation that shared abiotic conditions drive the genetic structure of the  
161 three species (Fig.3A-C).

162 Where landscape connectivity is high for the butterfly (Fig.3D, left panel), we observed  
163 strong common contributions of abiotic variables and host genetic structure to butterfly genetic  
164 structure (equivalent contributions to co-inertia axes 1-3). In addition, a limited part of the  
165 butterfly genetic structure can be uniquely explained by host genetic structure, as shown by the  
166 disproportional contribution of plant genetic structure to co-inertia axis 4, and of ant genetic  
167 structure to axis 5. Because this parallel genetic structure between the butterfly and its two  
168 hosts cannot be fully explained by abiotic variables, we suspect that reciprocal coevolutionary  
169 selection between the butterfly and its two hosts has reduced effective gene flow between the  
170 communities, thereby synchronizing the genetic structure of the host-parasite network. This  
171 notion is concordant with previously documented coevolutionary shifts in flower phenology  
172 (*G. pneumonanthe* plants) and surface chemistry (*Myrmica* ants) to escape local infestation by  
173 *P. alcon* butterflies (23, 24). Where postponed plant flowering and altered ant surface  
174 chemistry prevent reproduction of desynchronized butterfly immigrants, local coevolution has  
175 the potential to increase the genetic distance between communities, resulting in parallel genetic  
176 structure among the interacting species. Correspondingly, the genetic structure of another  
177 *Myrmica* ant species has been demonstrated to be closely associated with its local surface

178 chemistry signature, evolved to counter butterfly impacts (23). We conclude that spatial  
179 community structure provides opportunities for coevolution, while frequent local butterfly  
180 immigration (under high landscape connectivity) maintains relatively high levels of genetic  
181 diversity within metapopulations.

182 Where landscape connectivity is low (Fig.3D, right panel, Fig.4B), a more profound  
183 relation between butterfly and host genetic structure was apparent. Host genetic structure  
184 (plant: axes 2; ant: axis 3) and abiotic factors (axis 1) independently covaried with butterfly  
185 genetic structure (Fig. 3D), likely reflecting intense coevolutionary genetic parallelism. This  
186 result is consistent with the idea that habitat fragmentation can reinforce restrictions on  
187 effective gene flow driven by coevolution. Alternatively, coevolution has been shown to favour  
188 decreased dispersal in isolated patches as a strategy to maintain local coadaptation (21), and  
189 this could also generate genetic parallelism. However, considering that even the most isolated  
190 populations of this study system are potentially connected to others (Fig.1D), selection for  
191 reduced dispersal seems unlikely. Because habitat fragmentation intensifies coevolutionary  
192 pressures (Fig.3D, right panel), while decreasing genetic diversity (Fig.2A), our findings  
193 suggest the existence of coevolutionary “burning” spots, featured by increased local butterfly  
194 extinction risk. From a global viewpoint, we argue that the widespread occurrence of  
195 coevolutionary interactions renders communities even more vulnerable to habitat  
196 fragmentation than generally acknowledged.

197 Our study does not capture causal relationships between landscape connectivity and  
198 community dynamics, but it does provide unique perspectives on the strength of *in situ* species’  
199 associations under threat of habitat fragmentation. Decreased landscape connectivity due to  
200 land conversion and degradation has the potential to alter the balance between dispersal and  
201 coevolution while decreasing genetic diversity, resulting in locally overheated coevolution  
202 featured by increased extinction risk (Fig.4). Reconnecting these communities could restore  
203 coevolutionary dynamics and simultaneously improve butterfly genetic diversity and  
204 population persistence rate. Interestingly, relatively dense butterfly populations with high  
205 genetic diversity did not leave a noticeable mark on host genetic diversity. The gradual and  
206 reciprocal accumulation of coevolutionary genetic signatures over time likely has allowed  
207 coexistence without strong fluctuations in parasite and host genetic diversity. Building on this  
208 finding, we emphasize the strength of community genetic studies in detecting eco-evolutionary  
209 signatures that have been shaped over contemporary time periods. To shed light on the global  
210 extent of our findings, it would be insightful to deploy the used integrative strategy, combining  
211 pooled sequencing and multivariate genetic approaches, in other natural settings. Although a  
212 pooled sequencing approach complicates the generation of genetic marker-specific inferences  
213 (Fig. S3), it offers major advantages for studying *in situ* community dynamics. Its cost-  
214 efficiency could allow genotyping hundreds of populations with modest research budgets, and  
215 multivariate techniques subsequently allow disentangling the relative contributions of abiotic  
216 and coevolutionary drivers of community dynamics.

217 Predicting how species will cope with global environmental changes is a key ambition in  
218 evolutionary and ecological sciences. However, the lack of eco-evolutionary integration in  
219 forecasting models may compromise their ability to predict range dynamics and to provide  
220 realistic guidelines for sustainable conservation (27, 28). Based on our findings, we stress that  
221 ignoring the impacts of widespread coevolutionary networks on the ability of species to cope  
222 with global environmental changes can considerably affect outcomes of conservation strategies  
223 and forecasting models. Moreover, whereas habitat fragmentation has the potential to alter  
224 coevolutionary relations irrespective of other global environmental threats, the combined

225 impacts of multiple global environmental changes on community dynamics are expected to be  
226 distressing, but have yet to be assessed.  
227

## 228 **References and Notes:**

- 229 1. J. M. Tylianakis, R. K. Didham, J. Bascompte, D. A. Wardle, Global change and species  
230 interactions in terrestrial ecosystems. *Ecol. Lett.* **11**, 1351–1363 (2008).
- 231 2. S. E. Gilman *et al.*, A framework for community interactions under climate change. *Trends Ecol.*  
232 *Evol.* **25**, 325–31 (2010).
- 233 3. G. Strona *et al.*, Environmental change makes robust ecological networks fragile. *Nat. Commun.*  
234 **7**, 12462 (2016).
- 235 4. N. M. Haddad *et al.*, Habitat fragmentation and its lasting impact on Earth’s ecosystems. *Sci.*  
236 *Adv.* **1** (2015).
- 237 5. T. Newbold *et al.*, Global effects of land use on local terrestrial biodiversity. *Nature.* **520**, 45–50  
238 (2015).
- 239 6. N. Titeux, K. Henle, J.-B. Mihoub, L. Brotons, Climate change distracts us from other threats to  
240 biodiversity. *Front. Ecol. Environ.* **14**, 291–291 (2016).
- 241 7. D. Legrand *et al.*, Eco-evolutionary dynamics in fragmented landscapes. *Ecography.* **40**, 9–25  
242 (2017).
- 243 8. H. Toju *et al.*, Species-rich networks and eco-evolutionary synthesis at the metacommunity level.  
244 *Nat. Ecol. Evol.* **486**, 222–227 (2017)
- 245 9. M. C. Urban *et al.*, The evolutionary ecology of metacommunities. *Trends Ecol. Evol.* **23**, 311–7  
246 (2008).
- 247 10. P. A. Venail *et al.*, Diversity and productivity peak at intermediate dispersal rate in evolving  
248 metacommunities. *Nature.* **452**, 210–214 (2008).
- 249 11. P. Staddon, Z. Lindo, P. D. Crittenden, F. Gilbert, A. Gonzalez, Connectivity, non-random  
250 extinction and ecosystem function in experimental metacommunities. *Ecol. Lett.* **13**, 543–552  
251 (2010).
- 252 12. P. L. Thompson, B. Rayfield, A. Gonzalez, Loss of habitat and connectivity erodes species  
253 diversity, ecosystem functioning, and stability in metacommunity networks. *Ecography.* **40**, 98–  
254 108 (2017).
- 255 13. M. Baguette, S. Blanchet, D. Legrand, V. M. Stevens, C. Turlure, Individual dispersal, landscape  
256 connectivity and ecological networks. *Biol. Rev.* **88**, 310–326 (2013).
- 257 14. J. B. Logue, N. Mouquet, H. Peter, H. Hillebrand, Empirical approaches to metacommunities: a  
258 review and comparison with theory. *Trends Ecol. Evol.* **26**, 482–491 (2011).
- 259 15. H. Kokko *et al.*, Can Evolution Supply What Ecology Demands? *Trends Ecol. Evol.* (2017),  
260 doi:10.1016/j.tree.2016.12.005.
- 261 16. J. Cote *et al.*, Evolution of dispersal strategies and dispersal syndromes in fragmented  
262 landscapes. *Ecography.* **40**, 56–73 (2017).
- 263 17. B. K. Hand, W. H. Lowe, R. P. Kovach, C. C. Muhlfeld, G. Luikart, Landscape community  
264 genomics: understanding eco-evolutionary processes in complex environments. *Trends Ecol.*  
265 *Evol.* **30**, 161–168 (2015).
- 266 18. S. L. Nuismer, J. N. Thompson, R. Gomulkiewicz, Coevolutionary clines across selection  
267 mosaics. *Evolution.* **54**, 1102–1115 (2000).
- 268 19. J. N. Thompson, B. M. Cunningham, Geographic structure and dynamics of coevolutionary  
269 selection. *Nature.* **417**, 735–738 (2002).
- 270 20. P. H. Thrall *et al.*, Rapid genetic change underpins antagonistic coevolution in a natural host-  
271 pathogen metapopulation. *Ecol. Lett.* **15**, 425–435 (2012).
- 272 21. D. Start, B. Gilbert, Host–parasitoid evolution in a metacommunity. *Proc. R. Soc. London B Biol.*  
273 *Sci.* **283** (2016).
- 274 22. K. Räsänen, A. P. Hendry, Disentangling interactions between adaptive divergence and gene  
275 flow when ecology drives diversification. *Ecol. Lett.* **11**, 624–36 (2008).
- 276 23. D. R. Nash, T. D. Als, R. Maile, G. R. Jones, J. J. Boomsma, A Mosaic of Chemical Coevolution  
277 in a Large Blue Butterfly. *Science.* **319**, 88–90 (2008).
- 278 24. A. Valdés, J. Ehrlén, Caterpillar seed predators mediate shifts in selection on flowering  
279 phenology in their host plant. *Ecology.* **98**, 228–238 (2017).
- 280 25. N. Mouquet *et al.*, Conserving community modules: A case study of the endangered lycaenid  
281 butterfly *Maculinea alcon*. *Ecology.* **86**, 3160–3173 (2005).

- 282 26. J. A. Thomas, Butterfly communities under threat. *Science*. **353**, 2016–2018 (2016).
- 283 27. S. Lavergne, N. Mouquet, W. Thuiller, O. Ronce, Biodiversity and Climate Change: Integrating  
284 Evolutionary and Ecological Responses of Species and Communities. *Annu. Rev. Ecol. Evol.*  
285 *Syst.* **41**, 321–350 (2010).
- 286 28. D. H. Ikeda *et al.*, Genetically informed ecological niche models improve climate change  
287 predictions. *Glob. Chang. Biol.* **23**, 165–176 (2016).
- 288 29. P. Metailié, M. Paegelow, Land Abandonment and the Spreading of the Forest in the Eastern  
289 French Pyrenées in the Nineteenth to Twentieth Centuries, in Recent Dynamics of the  
290 Mediterranean Vegetation and Landscape, pp. 217–236 (2015).
- 291 30. D. Galop, D. Rius, C. Cugny, F. Mazier, A History of Long-Term Human–Environment  
292 Interactions in the French Pyrenees Inferred from the Pollen Data, in Continuity and Change in  
293 Cultural Adaptation to Mountain Environments, pp. 19–30 (2013).
- 294 31. M. Tessier, Inventaire de l’Azuré des mouillères *Maculinea alcon* (Denis & Schiffermüller,  
295 1775) (Lepidoptera Lycaenidae) en Ariège. *Bull. Soc. Linn. Bordeaux*. **43**, 205–212 (2015).
- 296 32. P. D. Etter, J. L. Preston, S. Bassham, W. A. Cresko, E. A. Johnson, Local de novo assembly of  
297 RAD paired-end contigs using short sequencing reads. *PLoS One*. **6**, e18561 (2011).
- 298 33. J. Catchen, P. A. Hohenlohe, S. Bassham, A. Amores, W. A. Cresko, Stacks: an analysis tool set  
299 for population genomics. *Mol. Ecol.* **22**, 3124–3140 (2013).
- 300 34. D. R. Zerbino, E. Birney, Velvet: Algorithms for de novo short read assembly using de Bruijn  
301 graphs. *Genome Res.* **18**, 821–829 (2008).
- 302 35. H. Li, R. Durbin, Fast and accurate short read alignment with Burrows-Wheeler transform.  
303 *Bioinformatics*. **25**, 1754–1760 (2009).
- 304 36. H. Li *et al.*, The Sequence Alignment/Map format and SAMtools. *Bioinformatics*. **25**, 2078–2079  
305 (2009).
- 306 37. D. W. Barnett, E. K. Garrison, A. R. Quinlan, M. P. Stromberg, G. T. Marth, BamTools: a C++  
307 API and toolkit for analyzing and managing BAM files. *Bioinformatics*. **27**, 1691–1692 (2011).
- 308 38. R. Kofler, R. V. Pandey, C. Schlotterer, PoPoolation2: identifying differentiation between  
309 populations using sequencing of pooled DNA samples (Pool-Seq). *Bioinformatics*. **27**, 3435–  
310 3436 (2011).
- 311 39. B. H. McRae, B. G. Dickson, G. W. Roemer, J. M. Rundall, M. Hayward, Ed., Circuitscape 4  
312 User Guide. The Nature Conservancy. (2013).
- 313 40. N. Mantel, The Detection of Disease Clustering and a Generalized Regression Approach. *Cancer*  
314 *Res.* **27**, 209–220 (1967).
- 315 41. P. E. Smouse, J. C. Long, R. R. Sokal, Multiple Regression and Correlation Extensions of the  
316 Mantel Test of Matrix Correspondence. *Syst. Zool.* **35**, 627–632 (1986).
- 317 42. J. Oksanen *et al.*, The vegan Package, Version 1.15-1. *Community Ecol.* (2008).
- 318 43. S. Dray, A. Dufour, J. Thioulouse, T. Jombart, S. Pavoine, Ade4: analysis of ecological data:  
319 exploratory and euclidean methods in environmental sciences. R Packag. version (2009).
- 320 44. M. Nei, T. Maruyama, R. Chakraborty, The Bottleneck Effect and Genetic Variability in  
321 Populations. *Evolution*. **29**, 1–10 (1975).
- 322 45. G. Luikart, J.-M. Cornuet, Empirical Evaluation of a Test for Identifying Recently Bottlenecked  
323 Populations from Allele Frequency Data. *Conserv. Biol.* **12**, 228–237 (1998).
- 324 46. P. Legendre, L. Legendre, *Numerical ecology* (Elsevier, 1998).
- 325 47. S. Dray, D. Chessel, J. Thioulouse, Co-Inertia analysis and the linking of ecological data tables.  
326 *Ecology*. **84**, 3078–3089 (2003).
- 327 48. A. Vanden Broeck *et al.*, Gene flow and effective population sizes of the butterfly *Maculinea*  
328 *alcon* in a highly fragmented, anthropogenic landscape. *Biol. Conserv.* **209**, 89–97 (2017).
- 329



330 **Acknowledgements:**

331 Raw reads are archived at the National Center for Biotechnology Information (BioProject to  
332 complete). SNP allele frequencies and flanking sequences are archived at Dryad (to complete).

333 We were pleased to obtain insightful comments on the manuscript from experts in the field of  
334 community ecology and landscape genomics, including Luc De Meester, Michael Hochberg,  
335 José MT Montoya, Olivier Rey, Stephanie Manel and Viktoriia Radchuk.

336 We thank Gaëlle Blanvillain, Sophie Dardenne, and many students for field assistance, and  
337 Murielle Richard for lab assistance. Annie Ouin (INRA), Thomas Houet (CNRS), and the Parc  
338 Naturel Régional Pyrénées Ariégeoises (Yannick Barascud and Julien Aït El Mekki) provided  
339 the GIS resources used for mapping levels of habitat fragmentation. Primary financial support  
340 was provided by the ANR GEMS & INDHET (ANR-13-JSV7-0010-01 and ANR-12 -BSV7-  
341 0023-02). HDK, VMS, JP and MB are members of the Excellence Lab TULIP (ANR-10-  
342 LABX-41).

343 Hanne De Kort wrote the manuscript, assisted with sampling, and performed the lab work and  
344 data analyses. Virginie Stevens and Michel Baguette provided the context of the project and  
345 supervised writing, sampling and data analysis. Jérôme Prunier performed the bio-informatics,  
346 and Marc Tessier located the community sites and introduced the study system. Camille  
347 Turlure assisted with the analysis of the field surveys, and Jérémy Monsimet assisted with  
348 sampling. All co-authors also commented on the manuscript.

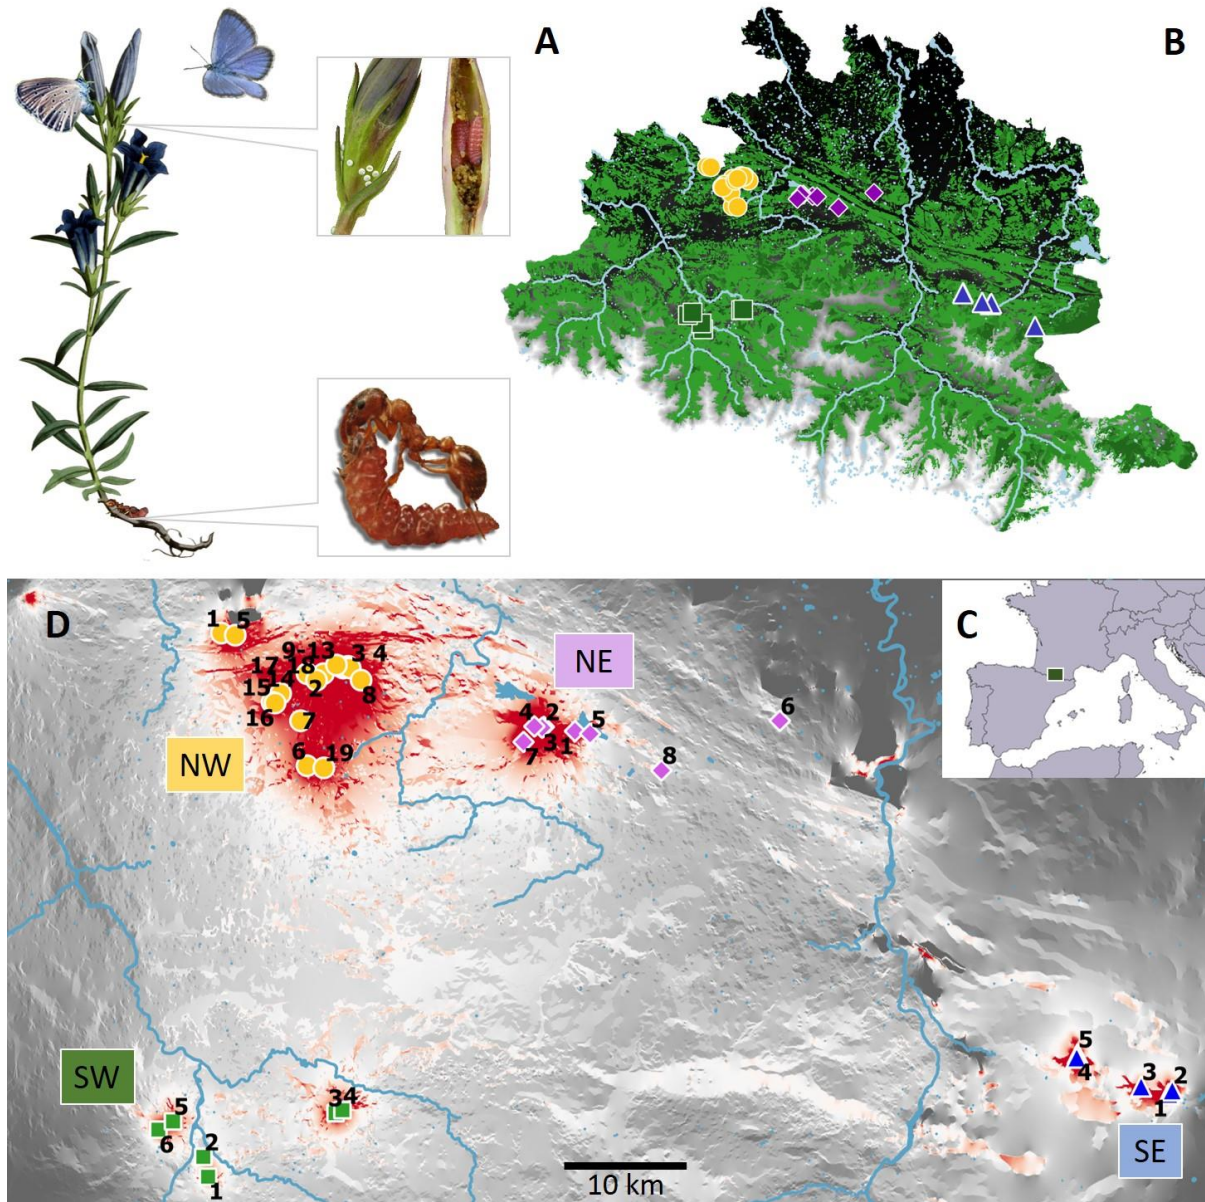

349

350 **Fig. 1.** Study system. **A.** Butterfly community. After mating, females Alcon blue butterflies  
351 (*Phengaris [=Maculinea] alcon*) lay their white eggs onto gentian (*Gentiana pneumonanthe*) flower  
352 buds. Small caterpillars develop into the bud, at the expense of gentian's ovules. After their 3<sup>rd</sup> molt,  
353 the caterpillars leave the plant and are adopted by ants (*Myrmica scabrinodis*), that rear them into their  
354 underground nest in preference to their own brood. This social parasitism ends after metamorphosis.  
355 For visibility, ant size was exaggerated relative to plant size. **B.** Overview of the study landscape in  
356 which the samples were collected, with tree cover shown in green, and with a black to white gradient  
357 reflecting altitude. Shape and colour of sampling locations correspond to their geographical cluster  
358 (yellow circles: NW, purple diamonds: NE, blue triangles: SE, green squares: SW). **C.** Positioning of  
359 sampling area in the French central Pyrenees (SW Europe). **D.** Landscape connectivity map of the study  
360 area representing butterfly dispersal probability. Red/grey colours represent habitat favouring/impeding  
361 dispersal. Rivers (blue) align with the main valleys. Geographical and demographic details about the  
362 sampling sites can be found in Table S1.

363

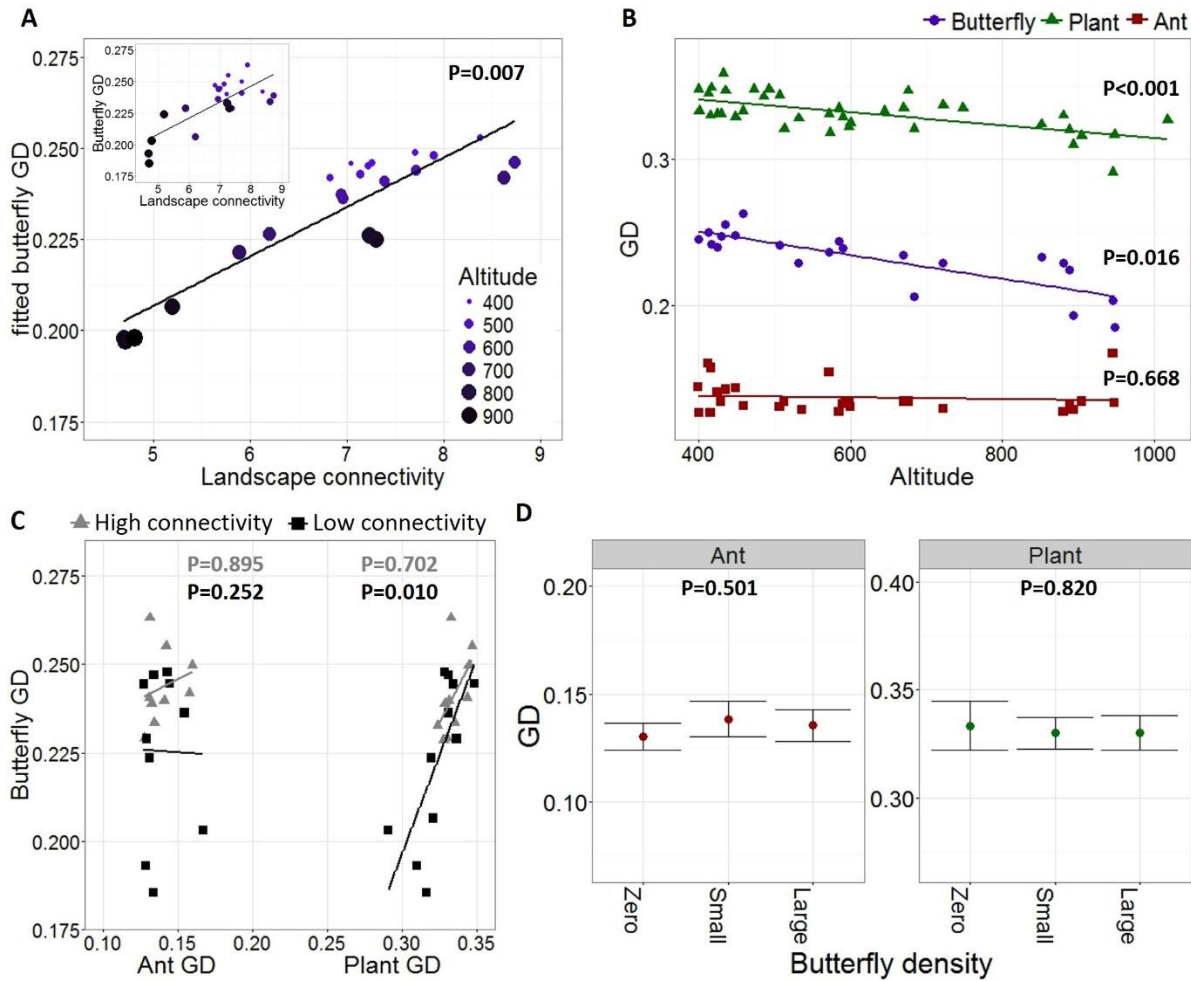

364

365 **Fig. 2.** Genetic diversity (GD) patterns of the butterfly community network. **A.** Correlation  
 366 between landscape connectivity and fitted and original butterfly  $H_E$  values. Fitted values result from a  
 367 weighted linear model with landscape resistance, altitude and patch size (Log10-transformed) as  
 368 explanatory variables (Table S4). Dots get darker and larger with altitude. **B.** Correlation between  
 369 altitude and genetic diversity of each species. **C.** Relation between butterfly and host genetic diversity  
 370 for both high landscape connectivity ( $>7.2$ , the median) and low landscape connectivity ( $<7.2$ ). **D.**  
 371 Parasitic effect of the butterfly (based on local population densities) on genetic diversity of hosts. Zero  
 372 butterfly density refers to recently extinct populations.

373

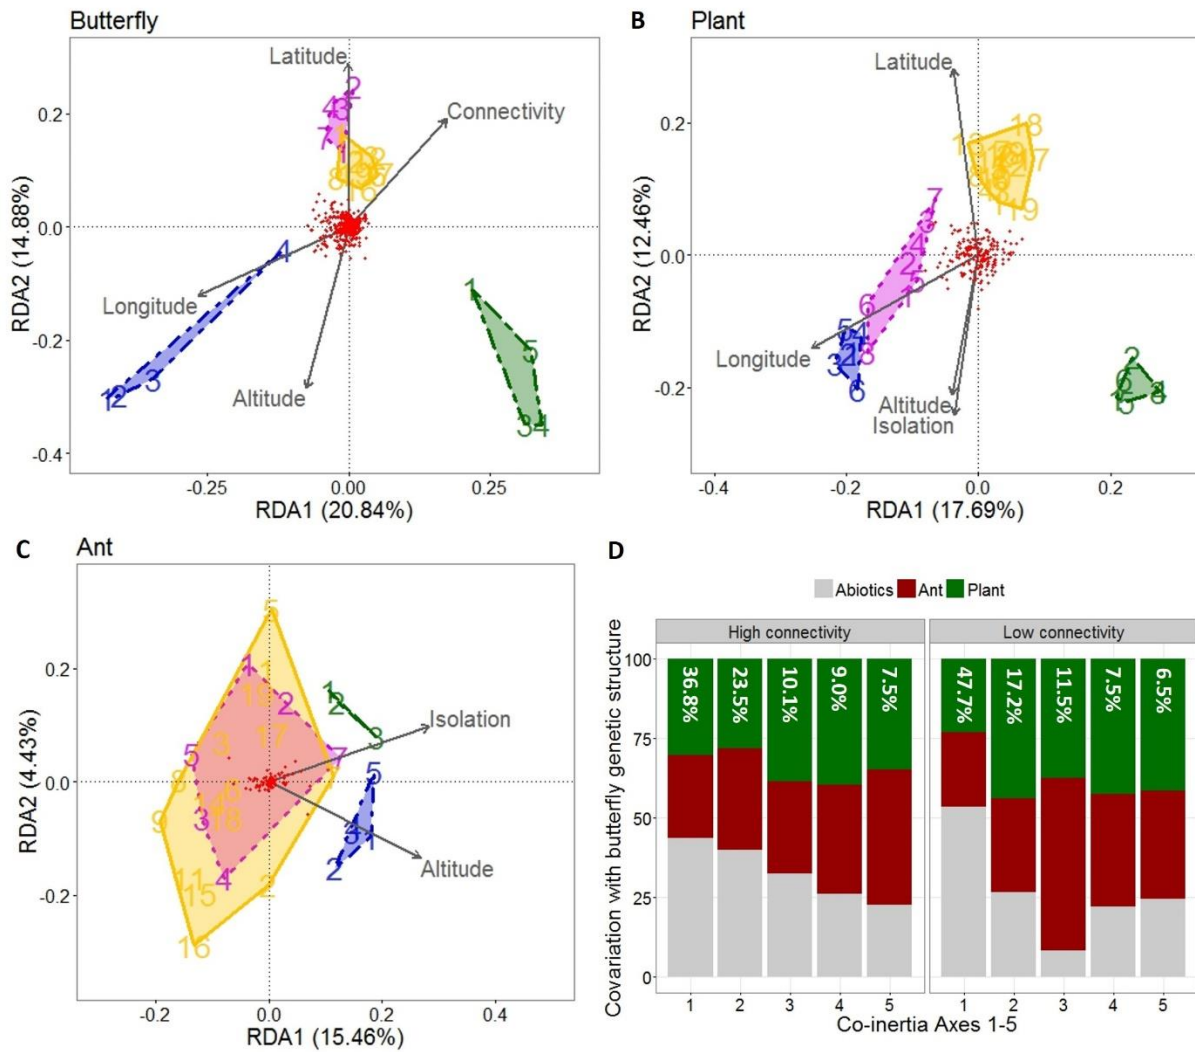

374

375

376

377

378

379

380

381

382

383

**Fig. 3.** Role of environmental factors contributing to the genetic structure of the butterfly community network. **A-C.** Triplots representing the genetic structure of butterfly, plant and ant, respectively, and the abiotic factors significantly contributing to this structure (Table S4). Colours correspond to spatial structure in Fig. 1D. **D.** Contribution of host genetic structure and abiotic factors to the genetic structure of Alcon populations. The first five axes of the co-inertia analyses explained a total of 86.89% and 90.34% of the covariation between the Alcon genetic matrix and the environmental matrix (altitude, longitude, latitude, landscape connectivity, ant and plant genetics), for the highly and poorly connected populations, respectively (Table S4). Contributions of each axis to the total coinertia are shown in white at the top of the bar plot.

384

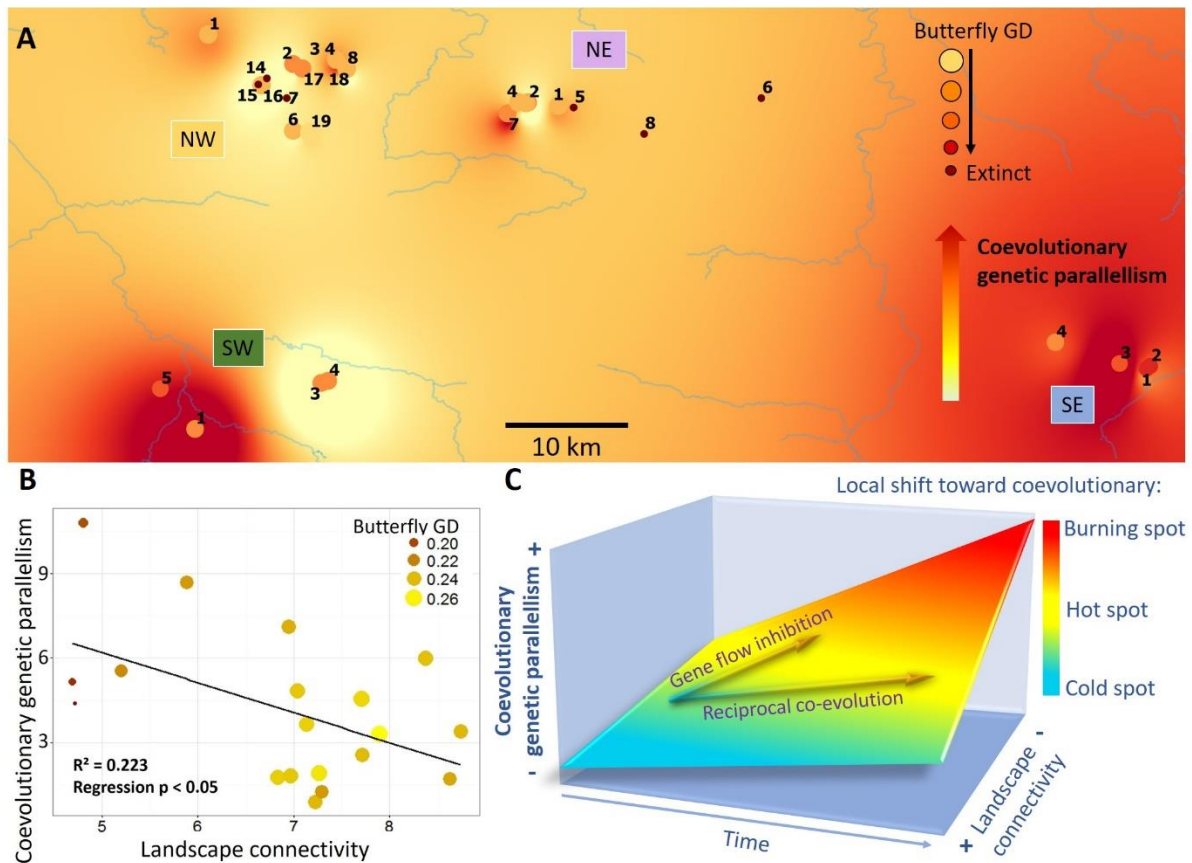

385

386 **Fig. 4.** Coevolutionary dynamics over space and time. **A.** Map showing the degree of  
 387 coevolutionary genetic parallelism between the butterfly and its two hosts. The degree of genetic  
 388 parallelism likely due to coevolution was derived from a coinertia analysis, through extracting the axis  
 389 that was mainly represented by host genetic structure (>90%) rather than by abiotic variation (Table  
 390 S5). Size and colour of site symbols reflects butterfly genetic diversity. Burning spots are featured by a  
 391 combination of low genetic diversity and high coevolutionary genetic parallelism. The extinctions in  
 392 the NW cluster are due to recently abandoned grazing management. **B.** Relation between coevolutionary  
 393 genetic parallelism and landscape connectivity. **C.** Graphical representation of a landscape varying in  
 394 the degree of connectivity. Communities in overly connected landscapes experience a gene flow  
 395 overload, resulting in sub-optimal conditions for coevolution (blue, cold spots). The absence of  
 396 coevolution is mirrored by a lack of coevolutionary genetic parallelism among species. Intermediate  
 397 landscape connectivity facilitates reciprocal coevolution, giving rise to coevolutionary hot spots  
 398 (yellow), featured by species that show genetic similarities due to coevolution. Highly fragmented  
 399 landscapes (poor landscape connectivity) compromise coevolutionary dynamics through selection for  
 400 decreased dispersal and/or constraints on effective gene flow, finally resulting in coevolutionary  
 401 burning spots of increased extinction risk.

402 **Supplementary Materials:**

403 Material and Methods

404 Figures S1-S6

405 Tables S1-S5

406 References (29-48)

407

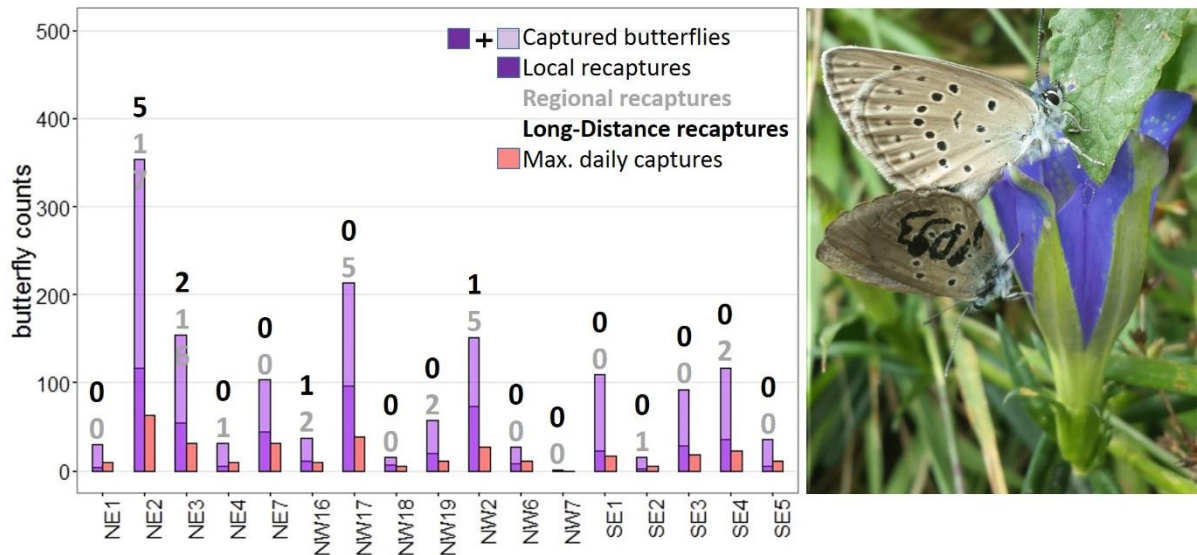

408

409 **Fig. S1.** Summary of individual movement monitoring of the NE, NW and SE cluster (summer of  
410 2014), showing number of (i) captured butterflies that were subsequently marked (captured  
411 butterflies), (ii) butterflies that were recaptured on site (local recaptures), (iii) butterflies that were  
412 recaptured and originated from another site within the same geographical cluster (regional recaptures),  
413 butterflies that were recaptured and originated from another site of another geographical group  
414 (long-distance recaptures). Long-distance recaptures only occurred between the NW and the NE  
415 metapopulation. These are the first field observations of *Maculinea alcon* dispersal exceeding 0.5 km  
416 (49). In addition, the number of captures on the best day (day with most captures) is shown. A  
417 photograph taken during individual movement monitoring shows a marked butterfly mating with an  
418 unmarked butterfly (marked later that day).  
419

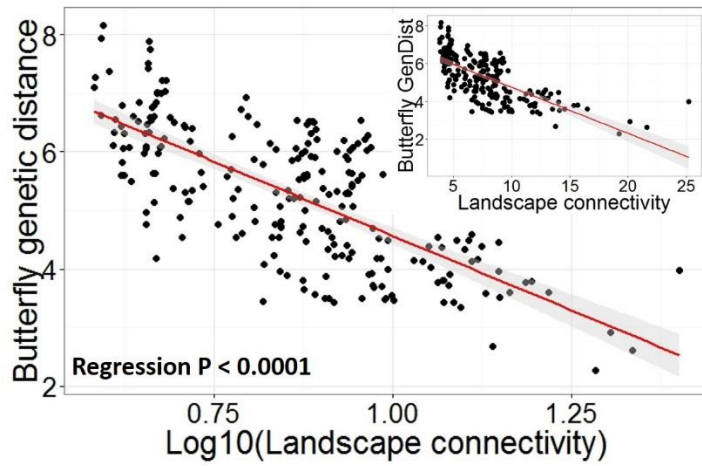

420

421 **Fig. S2.** Effect of landscape connectivity on butterfly genetic distance. The scatterplot shows  
422 pairwise landscape connectivity values vs. genetic distance. Regression p-value <  $10^{-16}$  for bot log10-  
423 transformed and original pairwise connectivity distances. Mantel test results can be found in Table S3.



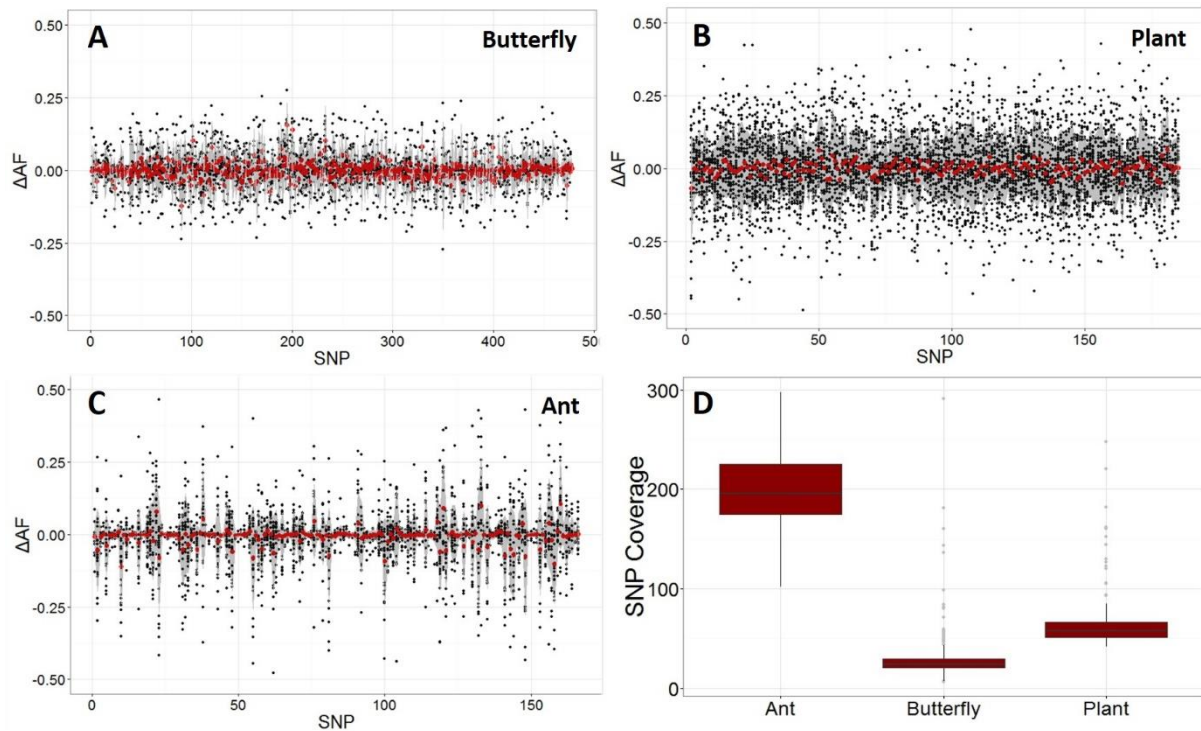

424

425 **Fig. S3.** Reliability (A-C) and coverage (D) of the SNPs used for all analyses. To assess the  
426 reliability of the SNP allele frequency (AF) estimates, a total of 6 (butterfly), 30 (plant) and 23 pool  
427 replicates (anta) were available, and SNP AFs were compared across pool replicates by calculating the  
428 difference in AF ( $\Delta AF$ ) for each SNP in each pair of pool replicates (black dots). Average  $\Delta AF$  values  
429 per SNP are represented by red dots.  $\Delta AF$  varied substantially, yet randomly, across SNPs and pools,  
430 but average  $\Delta AF$  was  $<0.01$  for each species, rendering the AF estimates suitable for multivariate  
431 genetic comparisons among populations and species. A detailed account of the pooled RADseq  
432 procedure that resulted in these SNPs is provided in the Material & Methods section.

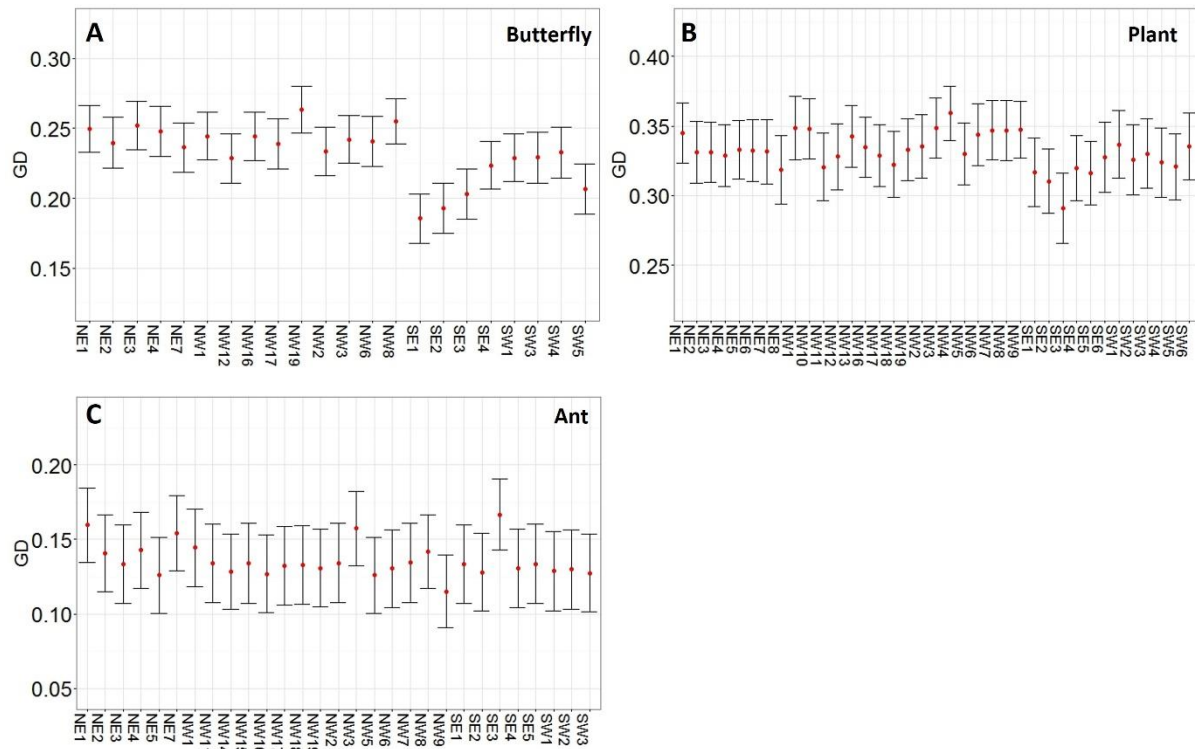

433

434 **Fig. S4.** Genetic diversity (mean expected heterozygosity, Table S1) of all successfully  
435 genotyped butterfly (A), plant (B) and ant (C) populations.

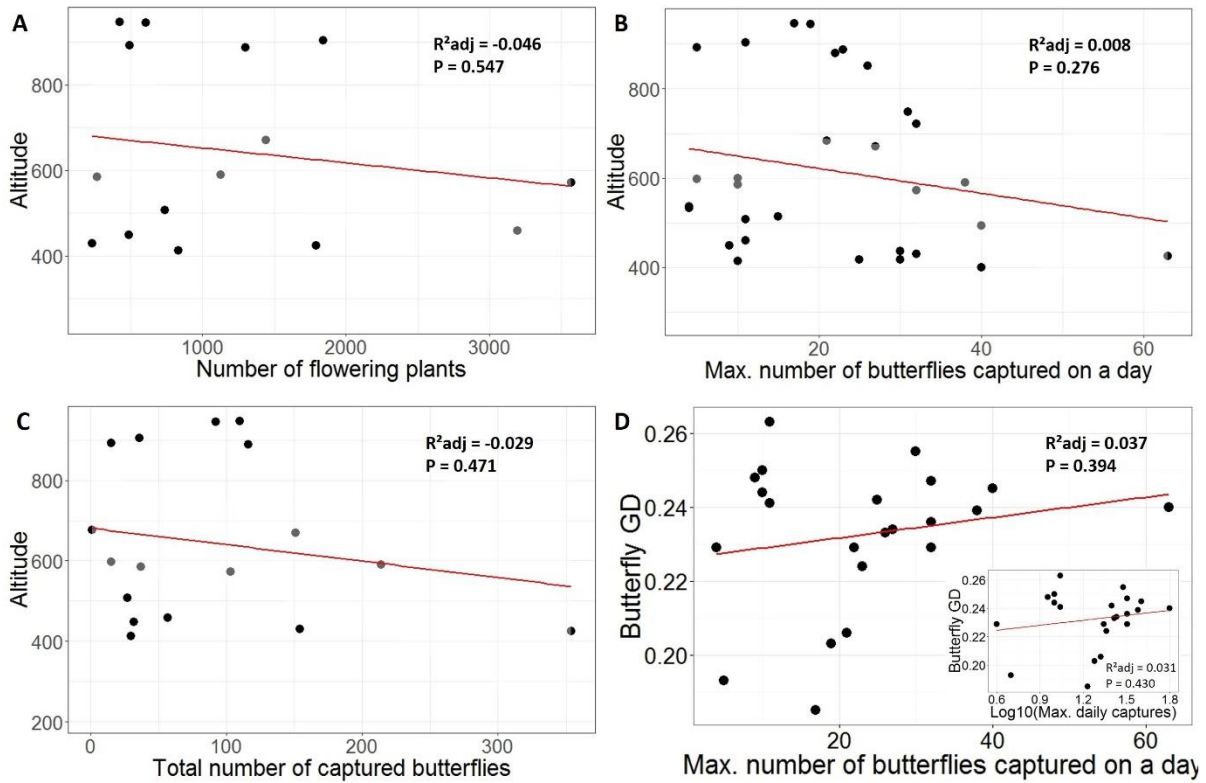

436

437 **Fig. S5. Field summary statistics.** A. Absence of a relation between plant population size  
438 (approximated by flowering plant counts) and altitude. B-C. Absence of a relation between butterfly  
439 population sizes, based on individual movement monitoring, and altitude. Field methodology is  
440 provided in Table S1. Statistics are based on linear regression. D. Absence of a relation between  
441 butterfly population size and butterfly GD.

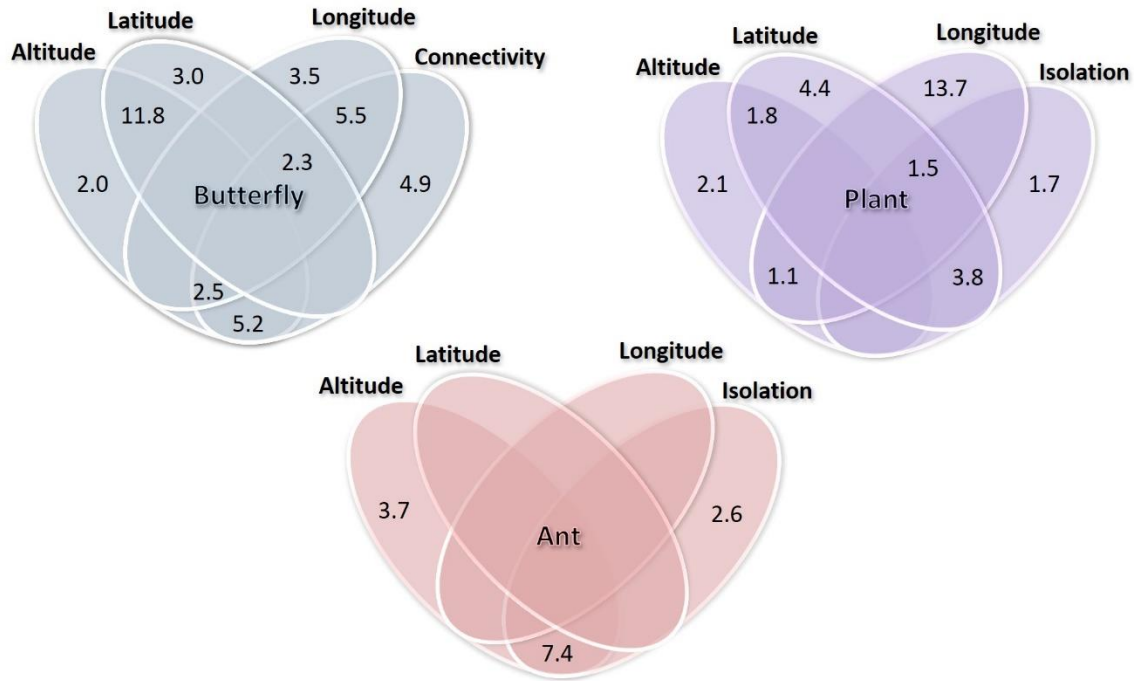

442

443 **Fig. S6.** Venn diagram showing unique and common abiotic contributions (%) to butterfly,  
444 plant and ant genetic structure. Values were obtained through redundancy analyses with variation  
445 partitioning (see Table S4). Only significant contributions are shown.

446 **Table S1.** Spatial, genetic and demographic population characteristics.

447 **Table S2.** Assignment of butterfly dispersal costs to (i) land use map categories, (ii) plant  
448 presence, and (iii) geological structures that have been found to be associated with plant  
449 presence. Higher dispersal costs correspond to lower landscape connectivity. The combination of  
450 cost assignments that best explained the genetic distance among butterfly populations (based on  
451 partial Mantel tests) is clarified in Table S3. These final dispersal costs were used to calculate  
452 pairwise and average landscape connectivity.

453 **Table S3.** Table of connectivity scenarios with partial Mantel test results. Connectivity  
454 scenarios reflect combinations of dispersal costs assigned to land use, plant presence and geology  
455 (=likely plant presence).

456 **Table S4.** Statistical modelling underlying the p-values provided in the text. Models are ranked  
457 according to the location of corresponding results in the manuscript. Butterfly habitat size was Log10-  
458 transformed to meet model assumptions. To assess the effect of pool size on regression model  
459 robustness, regression models were weighted by pool size and compared to unweighted models.  
460 Weighing by pool size did not affect model parameters.

461 **Table S5.** Overall coinertia analysis used to calculate degree of coevolutionary genetic parallelism  
462 between the butterfly and its two hosts.
